# Supplementary material for: Detection and Molecular Characterization of Rotavirus Infections in Children and Adults with Gastroenteritis from Vojvodina, Serbia
Source: MDPI journal article supplement (doi:10.3390/microorganisms10102050), 2022-10-17
Supplement: s1 [file s1]

**Table S1.** Alignment of the nucleotide sequences of the VP4 and VP7 rotavirus strains circulating in Vojvodina, Serbia with those of the Rotarix™ and RotaTeq™ vaccines.

| SEQUENCE VP4    |                     |                     | SEQUENCE VP7    |                   |               |               |               |               |               |
|-----------------|---------------------|---------------------|-----------------|-------------------|---------------|---------------|---------------|---------------|---------------|
| STRAIN          | Rotarix<br>G1P1A[8] | RotaTeq<br>G6P1A[8] | STRAIN          | Rotarix<br>G1P[8] | G1<br>RotaTeq | G2<br>RotaTeq | G3<br>RotaTeq | G4<br>RotaTeq | G6<br>RotaTeq |
|                 | [%]                 | [%]                 |                 | [%]               | [%]           | [%]           | [%]           | [%]           | [%]           |
| MT786706 G1P[8] | 91.33               | 93.37               | MT786714 G1P[8] | 96.77             | 93.91         | 73.74         | 78.14         | 74.91         | 79.57         |
| MT786708 G1P[8] | 91.46               | 93.47               | MT786718 G1P[8] | 97.62             | 94.86         | 72.73         | 79.84         | 78.80         | 79.84         |
| MT786712 G1P[8] | 91.33               | 93.37               | MT786722 G1P[8] | 96.82             | 94.35         | 76.07         | 81.27         | 78.80         | 80.92         |
| OP270604 G1P[8] | 89.32               | 94.66               | MT786715 G1P[8] | 95.61             | 93.42         | 75.24         | 79.62         | 76.80         | 80.88         |
| MT786707 G3P[8] | 90.26               | 94.36               | MT786717 G3P[8] | 80.70             | 80.38         | 76.90         | 92.41         | 76.90         | 85.76         |
| MT786705 G3P[8] | 89.32               | 94.44               | MT786713 G3P[8] | 81.0              | 80.69         | 76.95         | 92.89         | 77.26         | 86.29         |
| MT786710 G9P[8] | 90.26               | 93.33               | MT786720 G9P[8] | 79.50             | 78.78         | 76.90         | 84.53         | 77.70         | 82.73         |
| MT786709 G2P[4] | 82.65               | 84.13               | MT786719 G2P[4] | 74.20             | 75.16         | 95.54         | 74.52         | 71.02         | 75.16         |
| MT786711 G2P[4] | 82.14               | 83.67               | MT786721 G2P[4] | 73.51             | 74.50         | 95.36         | 74.50         | 70.53         | 74.83         |
| OP270605 G2P[4] | 83.92               | 85.43               | MT786716 G2P[4] | 74.13             | 74.76         | 94.95         | 74.13         | 70.98         | 74.76         |

Similarity percentages with analog-examined Rotarix™ vaccine strains higher than 90% are colored in blue; similarity percentages with analog-examined RotaTeq™ vaccine strains higher than 90% are colored in red.
